# Supplementary material for: Antimicrobial and Antibiofilm Activities of Carvacrol, Amoxicillin and Salicylhydroxamic Acid Alone and in Combination vs. Helicobacter pylori: Towards a New Multi-Targeted Therapy
Source: MDPI journal article supplement (doi:10.3390/ijms24054455), 2023-02-24
Supplement: s1 [file s1]

**Antimicrobial and Antibiofilm Activities of Carvacrol, Amoxicillin and  
Salicylhydroxamic Acid Alone and in Combination *versus Helicobacter pylori*: Towards  
a new multi-targeted therapy**

Valentina Puca<sup>1</sup>, Gabriele Turacchio<sup>2</sup>, Beatrice Marinacci<sup>1,3</sup>, Claudiu T. Supuran<sup>4</sup>, Clemente Capasso<sup>5</sup>, Pamela Di Giovanni<sup>1</sup>, Ilaria D'Agostino<sup>1</sup>, Simone Carradori<sup>1,†</sup>, Rossella Grande<sup>1,†,\*</sup>

<sup>1</sup>Department of Pharmacy, "G. d'Annunzio" University of Chieti-Pescara, 66100 Chieti, Italy; valentina.puca@unich.it (V.P.); beatrice.marinacci@unich.it (B.M.); pamela.digiovanni@unich.it (P.D.G.); ilaria.dagostino1@unich.it (I.D.A.); simone.carradori@unich.it (S.C.); rossella.grande@unich.it (R.G.)

<sup>2</sup>Institute of Endocrinology and Experimental Oncology "Gaetano Salvatore", National Research Council, 80131 Naples, Italy; gabriele.turacchio@ieos.cnr.it (G.T.)

<sup>3</sup>Department of Innovative Technologies in Medicine & Dentistry, "G. d'Annunzio" University of Chieti-Pescara, 66100 Chieti, Italy

<sup>4</sup>Neurofarba Department, Section of Pharmaceutical and Nutraceutical Sciences, University of Florence, 50019 Sesto Fiorentino, Florence, Italy; claudiu.supuran@unifi.it (C.T.S.)

<sup>5</sup>Department of Biology, Agriculture and Food Sciences, National Research Council (CNR), Institute of Biosciences and Bioresources, 80131 Naples, Italy; clemente.capasso@ibbr.cnr.it (C.C.)

†These authors contributed equally

\*Corresponding author

## MBEC CAR

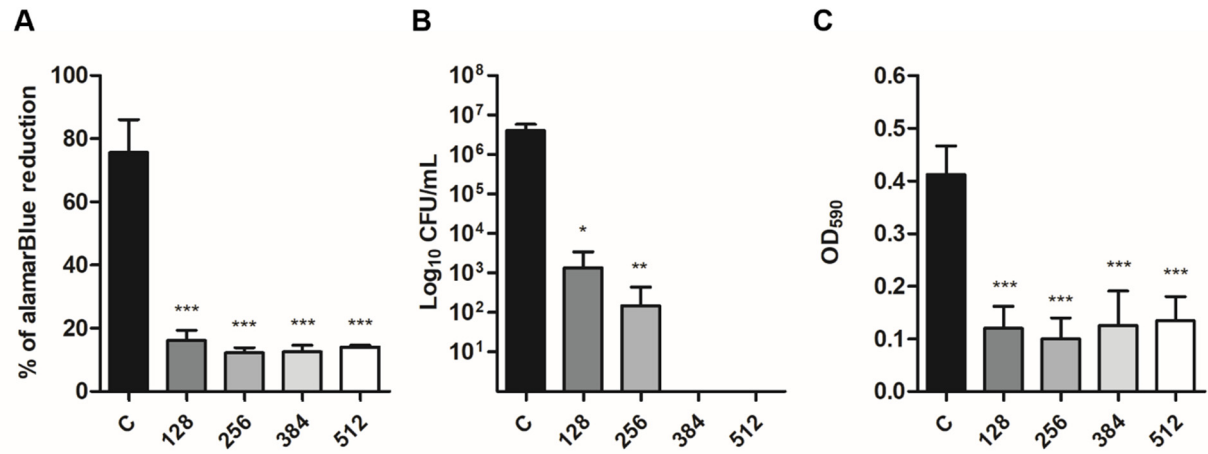

## MBEC AMX

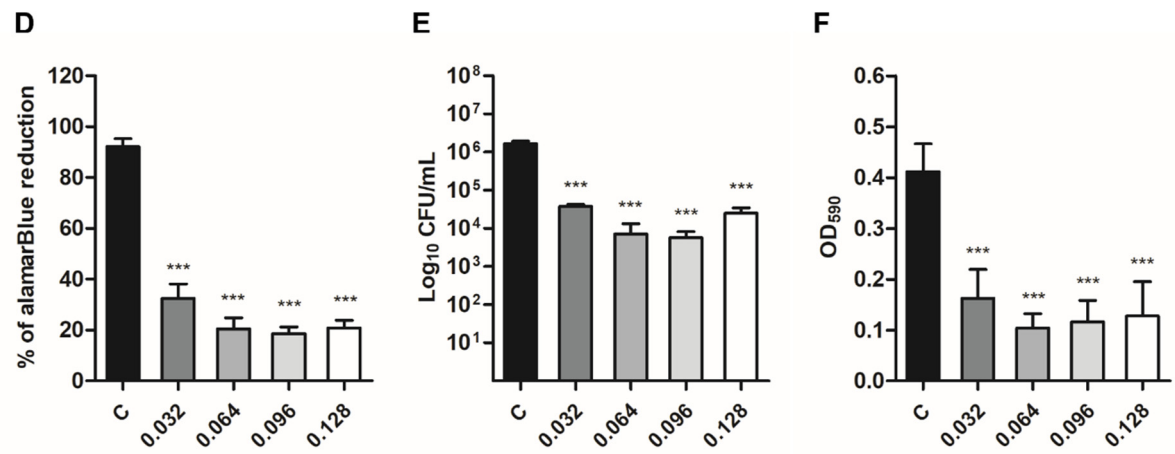

## MBEC CAR-AMX

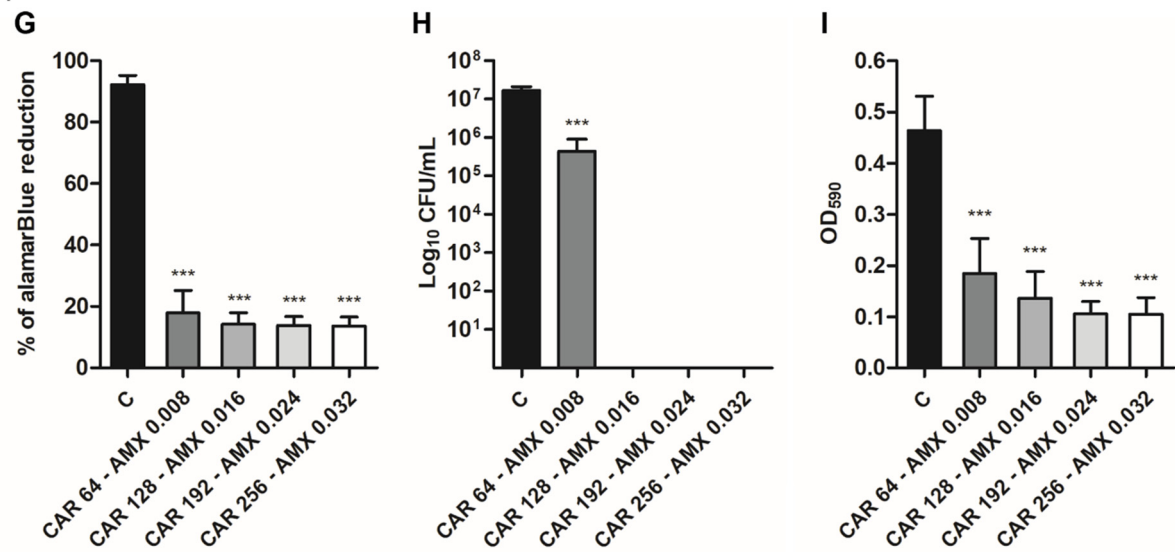

**Figure S1.** *In vitro* eradicating activity (MBEC) of CAR and AMX alone ( $\mu\text{g/mL}$ ) against *H. pylori* preformed biofilm. C: control biofilm; *H. pylori* biofilm was treated with: CAR and AMX at MIC concentrations (CAR 128  $\mu\text{g/mL}$  and AMX 0.032  $\mu\text{g/mL}$ ); with CAR and AMX at 2xMIC concentrations (CAR 256  $\mu\text{g/mL}$  and AMX 0.064  $\mu\text{g/mL}$ ); with CAR and AMX at 3xMIC concentrations (CAR 384  $\mu\text{g/mL}$  and AMX 0.096  $\mu\text{g/mL}$ ) and with CAR and AMX at 4xMIC concentrations (CAR 512  $\mu\text{g/mL}$  and AMX 0.128  $\mu\text{g/mL}$ ). (A–C) represent the MBEC of CAR alone; (D–F) represent the MBEC of AMX alone; (G–I) represent the MBEC of CAR and AMX in association *via* alamarBlue assay, the CFU count and the crystal violet assay, respectively. The results represent the mean  $\pm$  SD of three independent experiments. \*  $p < 0.05$  vs C, \*\*  $p < 0.005$  vs C; \*\*\*  $p < 0.001$  vs C (ANOVA + Dunnett's Multiple comparison test).

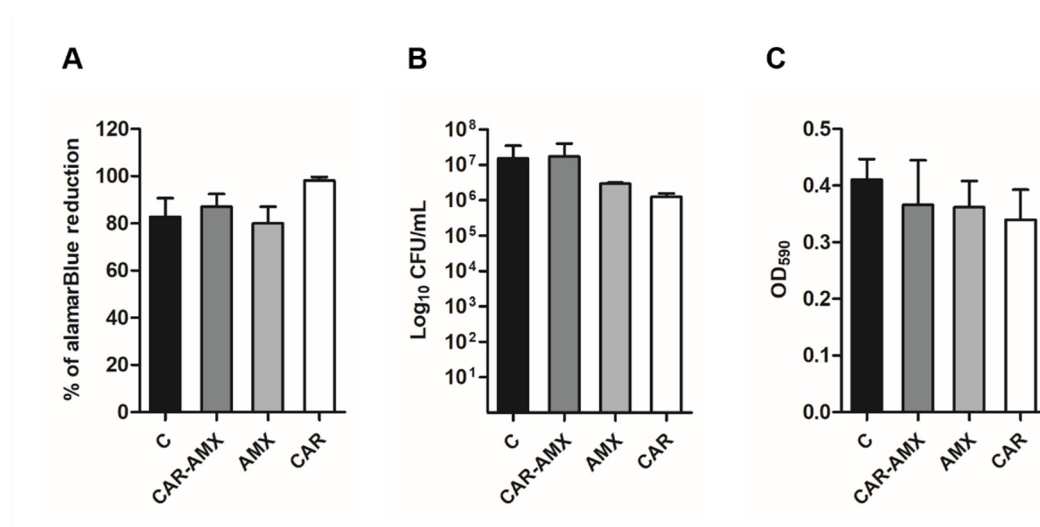

**Figure S2.** MBIC Determination of CAR and AMX, individually tested and in associations, *versus H. pylori* *via* alamarBlue assay (A), the CFU count (B) and the crystal violet assay (C). C: control biofilm.

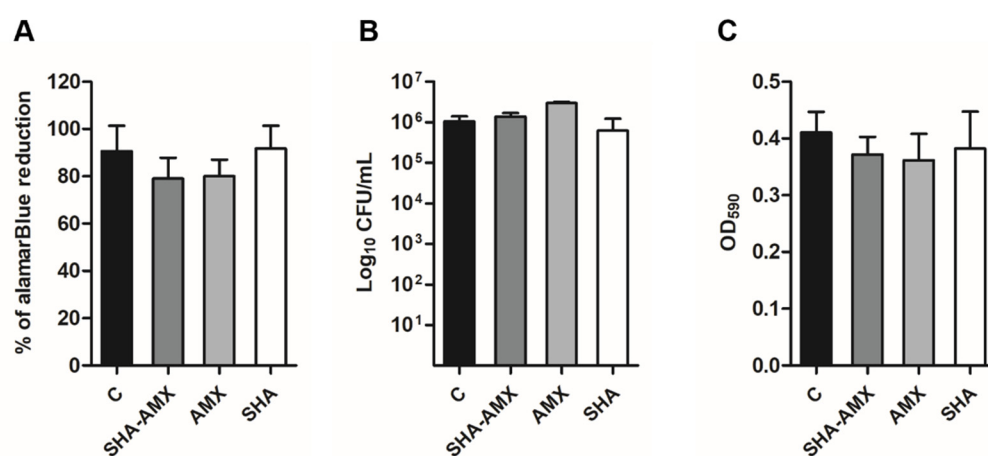

**Figure S3.** MBIC Determination of SHA and AMX, individually tested and in associations, *versus H. pylori* *via* alamarBlue assay (A), the CFU count (B) and the crystal violet assay (C). C: control biofilm.

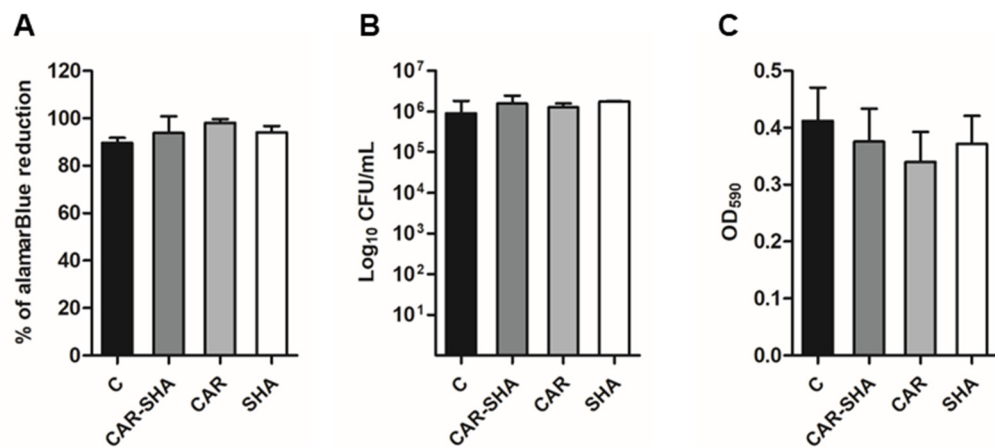

**Figure S4.** MBIC Determination of CAR and SHA, individually tested and in associations, versus *H. pylori* via alamarBlue assay (A), the CFU count (B) and the crystal violet assay (C). C: control biofilm.
